# Supplementary material for: A tri-responsive and fast self-healing organogel with stretchability based on multiple dynamic covalent bonds
Source: Royal Society of Chemistry journal article supplement (doi:10.1039/c9nj05201a), 2019-12-27
Supplement: c9nj05201a1.pdf [file c9nj05201a1.pdf]

## Electronic Supplementary Material

# A tri-responsive and fast self-healing organogel with stretchability based on multiple dynamic covalent bonds

Shujing Ren<sup>a</sup>, Huiqin Liang<sup>b</sup>, Panpan Sun<sup>a</sup>, Yanan Gao<sup>c\*</sup> and Liqiang Zheng<sup>a\*</sup>

<sup>a</sup>Key Laboratory of Colloid and Interface Chemistry, Shandong University, Ministry of Education, Jinan 250100, P. R. China.

<sup>b</sup>China Research Institute of Daily Chemistry Co., Ltd, Taiyuan 030001, P. R. China.

<sup>c</sup>Key Laboratory of Ministry of Education for Advanced Materials in Tropical Island Resources, Hainan University, No 58, Renmin Avenue, Haikou 570228, P. R. China.

### Experimental Section

Synthesis route of 3,3'-dithiobis (propionohydrazide) (DPH)

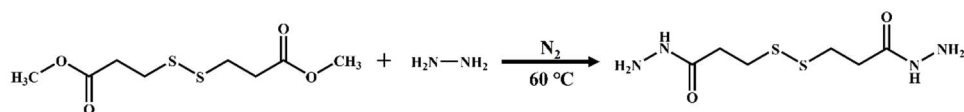

**Scheme S1.** The synthesis route for DPH.

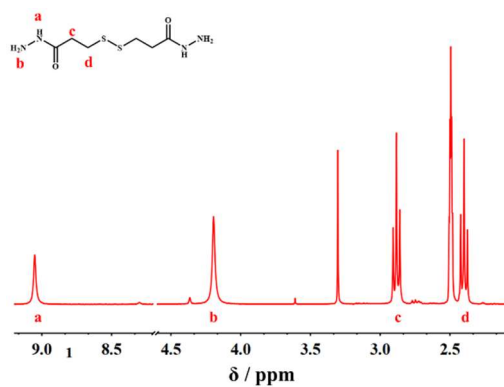

**Figure S1.**  $^1\text{H}$  NMR spectrum of DPH in DMSO- $d_6$ .

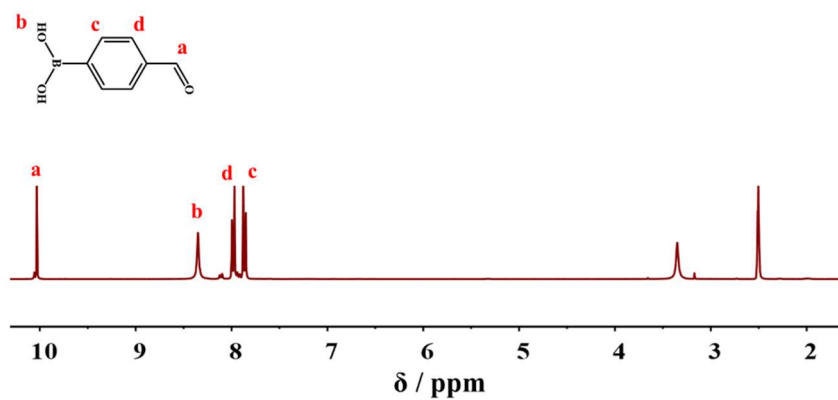

**Figure S2.** The  $^1\text{H}$  NMR spectrum of FPBA DMSO- $d_6$ .

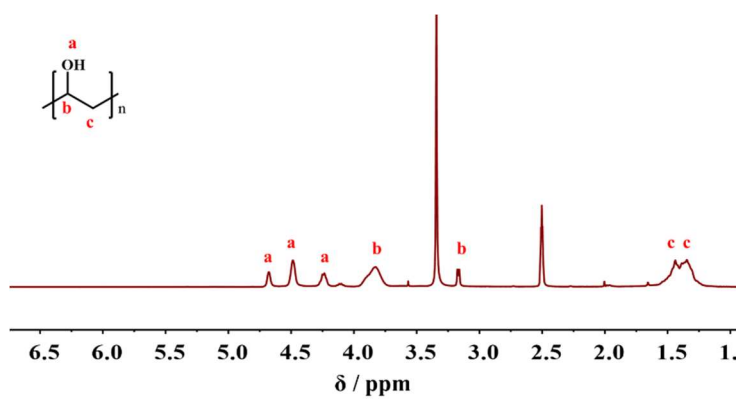

**Figure S3.** The  $^1\text{H}$  NMR spectrum of PVA in DMSO- $d_6$ .

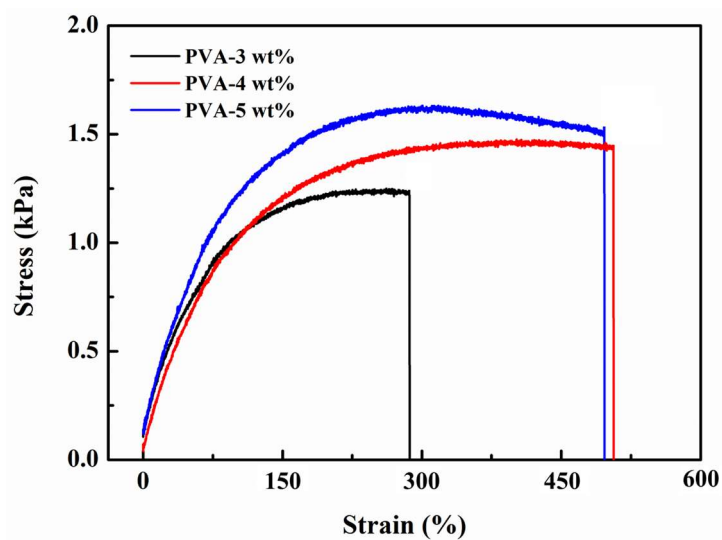

**Figure S4.** Tensile stress curves of  $G_{P-B-H}$  made from different concentrations of PVA, 3 wt%, 4 wt% and 5wt%, and the molecular ratio of FPBA to DPH was 2:1.

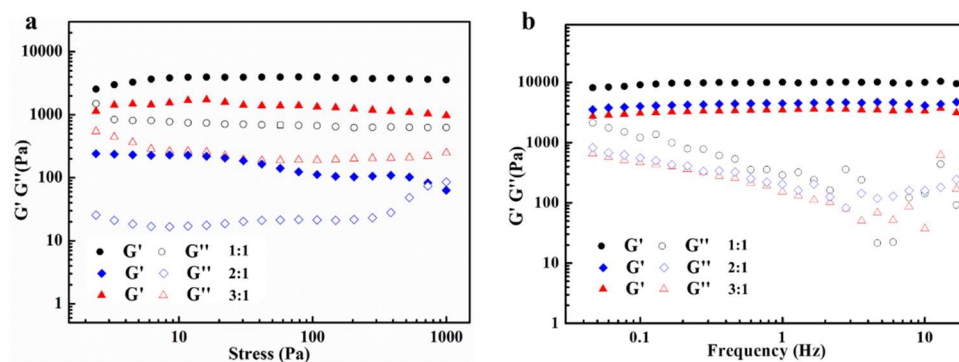

**Figure S5.** Rheological curves of organogels prepared at the molecular ratio of FPBA : DPH is 1:1, 2:1 and 3:1.
